# Supplementary material for: Controlling high coercivities in cm-scale buckypapers with unusual stacking of vertically aligned and randomly entangled Fe-filled carbon nanotubes
Source: Royal Society of Chemistry journal article supplement (doi:10.1039/c6ra15325a), 2016-01-01
Supplement: c6ra15325a1.pdf [file c6ra15325a1.pdf]

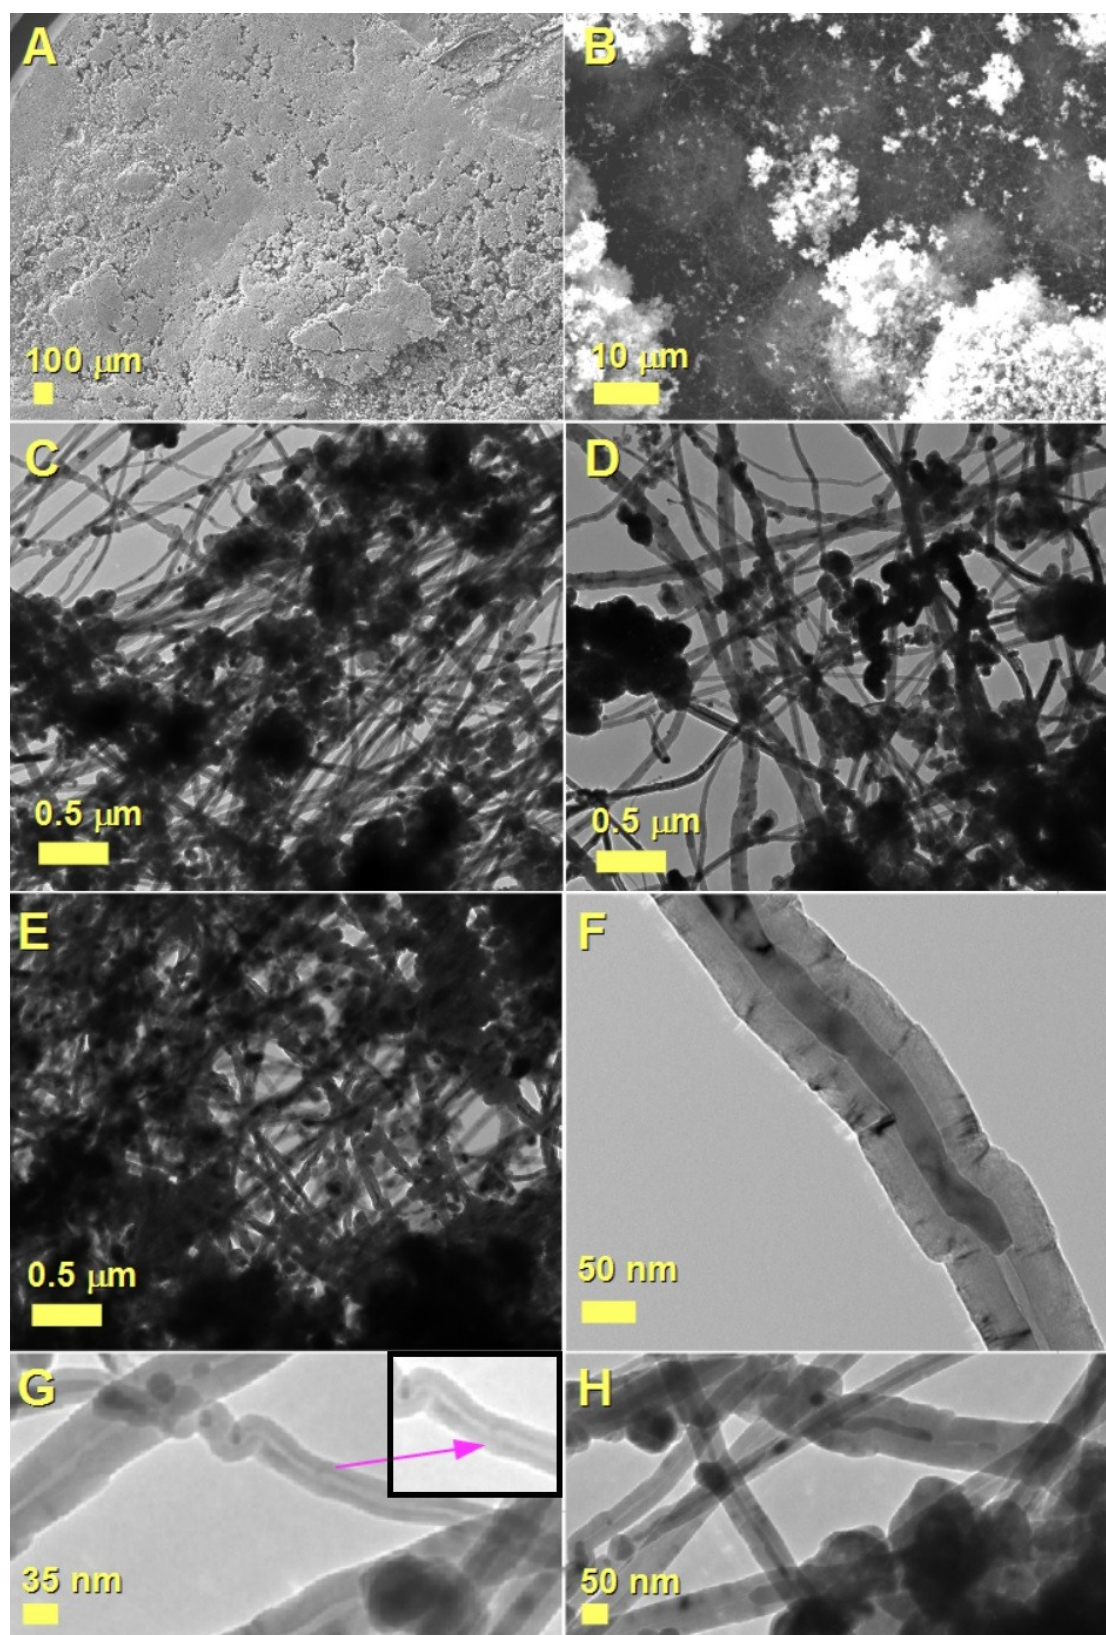

Figure 1 supp. info. (see text): SEM (A-E) and TEM (F-H) analyses of the randomly oriented entangled buckypaper obtained in conditions of vapour flow rate 100 ml/min and evaporation temperature of 100-110 °C.

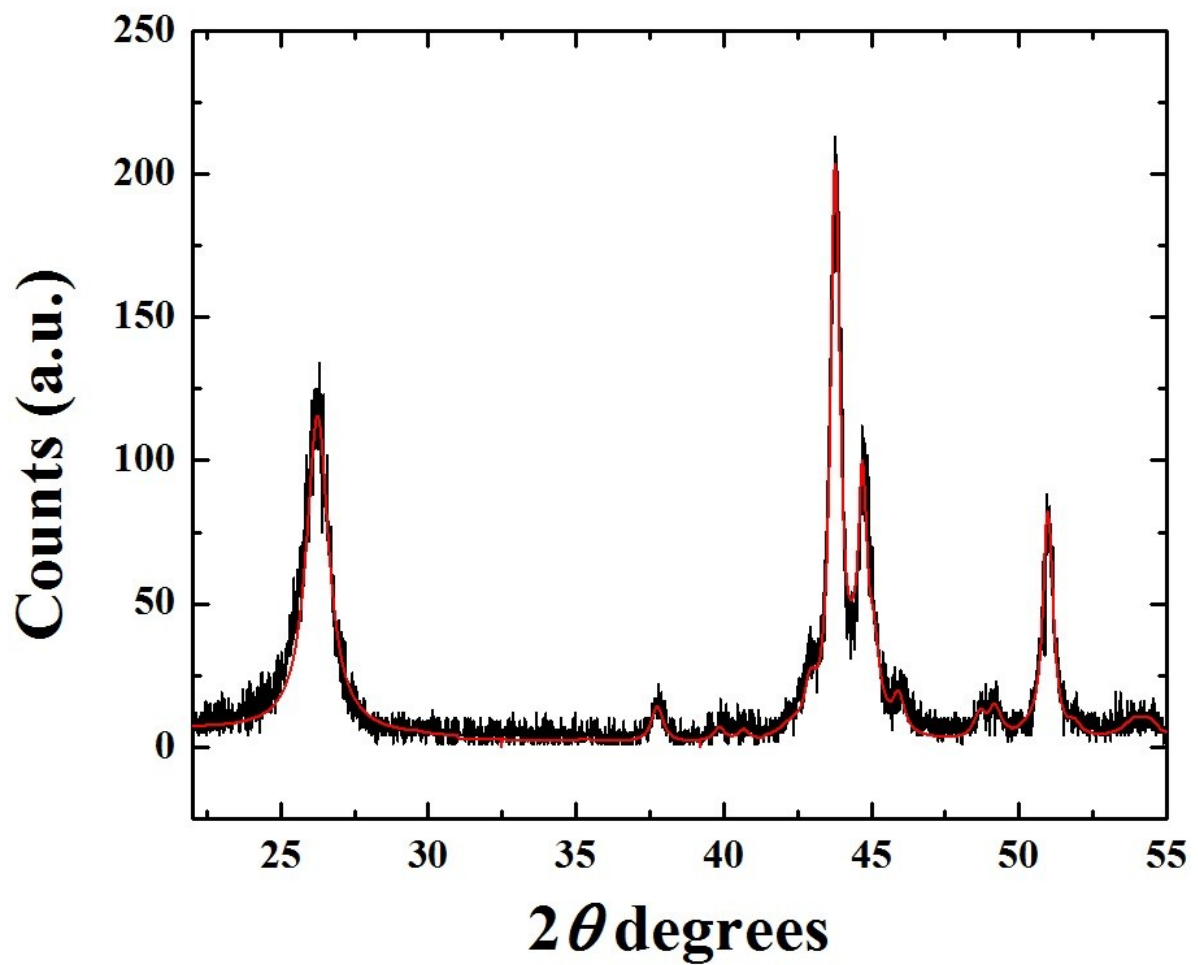

Figure 2 supp. info. : XRD analysis and Rietveld refinement (red line) of the randomly oriented entangled buckypaper obtained in conditions of vapour flow rate 100 ml/min and evaporation temperature of 70 °C.
